# Supplementary material for: Depletion of RIPK4 parallels higher malignancy potential in cutaneous squamous cell carcinoma
Source: PeerJ. 2022 Feb 10;10:e12932. doi: 10.7717/peerj.12932 (PMC8841032; doi:10.7717/peerj.12932)
Supplement: Supplemental Information 3 [file peerj-10-12932-s003.xlsx]

## Sheet: Fig. 1
Fig. 1B
	siR-RIPK4	siR-RIPK4
siR-NC	1	2
1	0.599305	0.444069
1	0.813163	0.425133

## Sheet: Fig. 2
Fig. 2A
Time(h)	Si-NC			Si-RIPK4-1			Si-RIPK4-2
0	1	1	1	1	1	1	1	1	1
24	0.997193	1.34835	0.995777	1.70436	1.74555	1.00676	2.7234	2.4922	2.3956
48	2.90107	2.16431	2.42453	3.5541	3.01436	2.72115	5.739	3.8233	3.2323
72	5.51022	5.21268	5.43945	8.4172	7.2695	7.62806	10.9568	14.882	11.631
96	9.81341	7.74742	8.765	10.9404	9.89194	10.4682	19.5765	8.532	16.2035
Fig. 2B
	G1			S			G2
Si-NC	50.1	41.42	45.94	28.45	38.21	43.02	21.44	20.38	10.97
Si-RIPK4-1	50.14	45.09	41.68	30.8	35.76	41.8	19.77	19.16	16.48
Si-RIPK4-2	51.72	53.34	49.97	35.88	33.63	32.7	14.14	14.65	13.96
Fig. 2C
	Si-NC	Si-RIPK4-1	Si-RIPK4-2
	2.2	2.4	2.33
	3.696	1.693	2.506
	2.306	3.23	2.99
Fig. 2D	Migrated cells/field				Fig. 2E	Invaded cells/field
	siR-NC	siR-RIPK4-1	siR-RIPK4-2			siR-NC	siR-RIPK4-1	siR-RIPK4-2
	89	136	123			87	133	105
	79	114	109			103	122	142
	82	106	122			61	94	118
Fig. 2F
	siR-NC	siR-RIPK4-1	siR-RIPK4-2
	82	132	97
	96	146	113
	89	136	138

## Sheet: Fig. 3
Fig. 3A
Time(h)	siR-NC(0 Gy)			siR-NC (2 Gy)			siR-NC (6 Gy)			siR-NC (10 Gy)			siR-RIPK4 (0 Gy)			siR-RIPK4 (2 Gy)			siR-RIPK4 (6 Gy)			siR-RIPK4 (10 Gy)
0 h	1	1	1	1	1	1	1	1	1	1	1	1	1	1	1	1	1	1	1	1	1	1	1	1
24 h	0.515602	2.22171	1.65514	0.632335	2.75596	2.15791	0.638868	2.25573	1.35875	0.717198	1.83872	1.03567	0.770078	3.23875	2.395	1.34803	1.9616	1.73272	1.39901	2.54437	1.35353	1.96674	2.56365	1.23573
48 h	1.03447	4.83254	7.15386	2.11071	4.19333	5.7442	1.24821	3.11035	2.46488	1.23812	2.1697	1.56889	2.14561	9.08107	6.94469	2.46532	3.90333	3.39883	2.52249	3.6223	2.80614	2.74701	3.2694	1.93231
72 h	7.63789	8.06456	16.8179	5.84895	6.96198	11.3941	2.46817	2.4455	3.34902	2.32169	1.85414	1.59075	7.72397	14.7493	17.376	6.54603	5.45974	8.48228	4.50878	3.54034	3.9836	3.57463	2.80828	1.66883
96 h	9.24649	11.1852	19.618	6.51114	7.49445	17.5116	1.68091	1.83715	4.14201	1.28671	1.0547	1.38169	10.5071	17.1922	20.4045	8.30684	6.47832	15.3103	2.67586	3.0457	5.38205	2.03632	1.67438	2.1248
Fig. 3B
	siR-NC			siR-RIPK4
0 Gy	103.261	96.7391	101.2	110.451	97.408	106.5
2 Gy	76.2542	74.9164	75.69	89.4047	79.5151	85.63
6 Gy	19.5652	17.8094	18.25	23.9967	25.7525	24.96
10 Gy	4.76589	2.92642	3.56	3.42809	3.09364	3.23
Fig. 3C
	siR-NC			siR-RIPK4
0 Gy	8.21	8.24	8.23	7.8	11.17	8.96
2 Gy	15.06	10.78	12.63	10.56	12.57	11.25
6 Gy	22.4	19.82	20.86	17.56	19.9	18.57
10 Gy	31.8	31.19	31.52	26.71	28.94	27.58
Fig. 3D
	0Gy			2Gy			6Gy			10Gy
G1	52.88	50.91	66.48	46.33	50.26	66.35	34.02	45.05	51.4	27.17	38.29	39.92
S	27.17	38.29	39.92	29.71	26.62	21.94	23.74	23.36	27.36	27.57	17.92	19.85
G2	22.46	20.66	9.14	23.96	23	11.73	42.25	31.6	21.26	45.27	43.8	40.5
Fig. 3E	0Gy			2Gy			6Gy			10Gy
G1	53.74	54.17	71.55	45.16	51.25	68.28	43.25	50.92	61.6	29.14	38.57	40.29
S	26.24	28.93	18.42	21.99	27.16	19.29	21.78	22.28	19.27	25.35	18.53	16.17
G2	19.93	16.66	10.04	32.87	21.56	12.45	34.96	26.82	19.14	45.52	42.91	43.56
